**Title: High paracellular nutrient absorption in intact bats is associated with high paracellular permeability in perfused intestinal segments**

Antonio Brun<sup>1</sup>, Edwin R. Price<sup>2</sup>, Manuel N. Gontero-Fourcade<sup>1</sup>, Guido Fernandez-Marinone<sup>1,4</sup>, Ariovaldo P. Cruz-Neto<sup>3</sup>, William H. Karasov<sup>2</sup>, E. Caviedes-Vidal<sup>1,4,\*</sup>

<sup>1</sup>*Laboratorio de Biología Integrativa, Instituto Multidisciplinario de Investigaciones Biológicas de San Luis, Consejo de Investigaciones Científicas y Técnicas, San Luis 5700, Argentina*

<sup>2</sup>*Department of Forest and Wildlife Ecology, University of Wisconsin-Madison, Madison, WI 53706, U.S.A.*

<sup>3</sup>*Departamento de Zoologia, Instituto de Biociências, Universidade Estadual Paulista “Julio de Mesquita Filho” Rio Claro, São Paulo, Brazil*

<sup>4</sup>*Departamento de Bioquímica y Ciencias Biológicas, Universidad Nacional de San Luis, San Luis 5700, Argentina*

\* Corresponding author:

Enrique Caviedes-Vidal

Laboratorio de Biología Integrativa

Instituto Multidisciplinario de Investigaciones Biológicas de San Luis (IMIBIO-SL)

CONICET – Universidad Nacional de San Luis

Chacabuco 917. San Luis 5700, Argentina

Ph: +54 (266) 4520300 ext. 6611

e-mail: [enrique.caviedes@gmail.com](mailto:enrique.caviedes@gmail.com)

**Summary**

Water-soluble nutrients are absorbed by the small intestine via transcellular and paracellular mechanisms. Based on a few previous studies, the capacity for paracellular nutrient absorption seems greater in flying mammals than in nonflying mammals, but there has been little investigation of the mechanisms driving this difference. Therefore, we studied three species each of bats (*Artibeus lituratus*, *Sturnira lilium*, *Carollia perspicillata*) and nonflying

mammals (*Akodon montensis*, *Mus musculus*, *Rattus norvegicus*). Using standard pharmacokinetic techniques in intact animals, we confirmed the greater paracellular nutrient absorption in the fliers, comparing one species in each group. Then we conducted *in situ* intestinal perfusions on individuals of all species. In both approaches, we measured the absorption of 3OMD-glucose, a nonmetabolizable glucose analog absorbed both paracellularly and transcellularly, as well as L-arabinose that has no mediated transport. Fractional absorption (*f*) of L-arabinose was three times higher in the bat (*S. lilium*:  $1.2 \pm 0.24$ ) than in the rodent (*A. montensis*:  $0.35 \pm 0.04$ ), whereas  $f_{3\text{OMD-glucose}}$  was complete in both species ( $1.46 \pm 0.4$  vs.  $0.97 \pm 0.12$ , respectively). In agreement, bats exhibited 2-12 times higher L-arabinose clearance per  $\text{cm}^2$  nominal surface area than rodents in intestinal perfusions. Using L-arabinose, we estimated that the contribution of the paracellular pathway to total glucose absorption was higher in all 3 bats (109-137%) than the rodents (13-39%). These findings contribute to an emerging picture that reliance on the paracellular pathway for nutrient absorption is much greater in bats relative to nonflying mammals and that this difference is driven by differences in intestinal permeability to nutrient-sized molecules.

## Keywords

Intestine; mediated absorption; paracellular absorption: arabinose; flight; bats; intestinal perfusion; *Akodon montensis*; *Sturnira lilium*; *Artibeus lituratus*; *Carollia perspicillata*; *Mus musculus*; *Rattus norvegicus*

**Running head:** Intestinal perfusions in bats and rodents

## Introduction

Water-soluble nutrients are absorbed at the small intestine via the transcellular and paracellular pathways. The transcellular pathway is mediated by membrane transporters in the apical side of enterocytes that translocate nutrients from the intestinal lumen into the cytosol, and then export of nutrients to the bloodstream is achieved by mediated transport by transporter(s) in the basolateral membrane. In contrast, the paracellular pathway is not transporter mediated; water-soluble compounds reach the basolateral space by traversing tight junctions (formed by adjacent enterocytes) by diffusion or solvent drag (Pappenheimer and Reiss, 1987).

Recent studies suggest that the paracellular pathway may be quantitatively important to nutrient absorption in some vertebrates (He et al., 1998; Karasov et al., 2012; McWhorter, 2005). In particular, paracellular absorption accounts for 60-90% of the glucose absorption in all small birds and bats studied to date (Caviedes-Vidal et al., 2008; Caviedes-Vidal et al., 2007; Chediack et al., 2003; Tracy et al., 2007). In contrast, transporter-mediated absorption is much more important in terrestrial mammals (Lavin and Karasov, 2008; Lavin et al., 2007). Caviedes-Vidal et al. (2007) hypothesized that this heavy reliance on paracellular nutrient absorption evolved independently in flying mammals and birds, which have similar daily energy needs compared to nonfliers, probably to compensate for fliers' lower absorptive surface area in smaller and lighter intestines than in nonfliers. Absent the special need for the complementary paracellular absorption pathway, natural selection may favor absorption of water soluble nutrients by specific apical transporters in order to maintain a better selective barrier against hydrosoluble toxins (Karasov et al., 2012).

Although the capacity for paracellular nutrient absorption has been assessed in a small number of bats and rodents (Caviedes-Vidal et al., 2008; Fasulo et al., 2013a; Fasulo et al., 2013b; Karasov et al., 2012; Pappenheimer, 1990; Price et al., 2013b; Tracy et al., 2007), the mechanistic underpinnings of the differences among taxa have received less attention. Paracellular absorption is measured using nonmetabolized hydrophilic carbohydrate probes that lack affinity for intestinal mediated uptake mechanisms (e.g., L-arabinose; Lavin et al., 2007). Greater absorption of paracellular probes by bats could be due to longer retention time in the intestine, or differences in gastric evacuation (Shilton et al., 1999). Alternatively, bats might have intestines with greater paracellular permeability per unit intestinal area than those of rodents, a feature that could arise from a greater number of tight junctions per unit area or higher permeability of the tight junctions. One approach for assessing these alternatives is to use *in situ* intestinal luminal perfusions, which obviate any effects of differential retention time or gastric emptying. Price et al. (2013a) assessed L-arabinose absorption using intestinal luminal perfusions in an insectivorous bat (*Tadarida brasiliensis*); they concluded that the majority of glucose absorption was paracellular in that species. However, to date, no perfusion studies have directly compared bats to nonflying mammals using uniform methodology.

To that end, we conducted *in situ* intestinal luminal perfusions on three bats and three rodents, all of which feed primarily on carbohydrate-rich diets. We selected three frugivorous bats and an omnivorous rodent from southeastern Brazil, and we also performed intestinal perfusions on laboratory mice and rats. Together, these species represent a range of

body masses with overlap between the bats and rodents, and thus help to control for any effect of body mass (Caviedes-Vidal et al., 2007; Pappenheimer, 1990). In addition, we measured the whole-animal fractional absorption of L-arabinose in the wild rodent and one bat species to expand our survey of measurements in intact animals and to demonstrate connections between tissue-level characteristics and an organismal-level phenomenon [measurements in intact animals were previously made for most of the other species of this study; (Caviedes-Vidal et al., 2008; Fasulo et al., 2013b; Lavin et al., 2007)]. In both approaches we used the carbohydrate L-arabinose ( $M_r = 150.1$ ), a neutral nonmetabolized paracellular probe that does not interact with intestinal nutrient transporters, and 3-O-methyl-D-glucose (3OMD-glucose;  $M_r = 194.2$ ), a nonmetabolized analog of D-glucose ( $M_r = 180.2$ ) that is passively absorbed through the paracellular space but also transported across the enterocyte membrane by glucose transporter SLGT1. Based on the hypothesis stated above, we predicted that intact bats would absorb more L-arabinose than intact rodents. We also hypothesized that this difference among taxa derives mechanistically from differences in intestinal permeability characteristics. We therefore predicted that in our intestinal perfusion experiments: absorption of 3OMD-glucose would be similarly fast and extensive in all the animals, the bats would absorb more L-arabinose than the rodents per  $\text{cm}^2$  nominal intestine, and that paracellular absorption would account for a higher percentage of glucose absorption in bats compared to rodents.

## Results

### *Intestinal perfusions*

L-arabinose clearance varied significantly among species ( $F_{5,29} = 28.9$ ,  $P < 0.001$ ; Fig. 1), and the bats exhibited 2-12 times higher L-arabinose clearance per  $\text{cm}^2$  nominal surface area than the rodents. In pair-wise statistical comparisons, *A. lituratus* and *S. lilium* had significantly higher L-arabinose clearance than the three rodents ( $P < 0.05$ ). L-arabinose clearance in *C. perspicillata* was significantly higher than *R. norvegicus* and *M. musculus* ( $P < 0.05$ ) but was not significantly different from *A. montensis* ( $P = 0.072$ ), despite having nearly double the L-arabinose clearance. Among rodents we found no significant differences in L-arabinose clearance ( $P > 0.05$ ).

D-glucose absorption did not differ significantly among the species ( $F_{5,30} = 2.31$ ,  $P = 0.069$ ; Fig. 2). Similarly, there were no significant differences among species in 3OMD-glucose absorption ( $F_{4,25} = 0.726$ ,  $P = 0.583$ ; Fig. 2). Across all measurements in all species,

D-glucose and 3OMD-glucose absorption were correlated ( $F_{1,28}=11.77$ ;  $r^2=0.29$ ;  $P=0.002$ ; data not shown).

The proportions of D-glucose and 3OMD-glucose absorption that were estimated to be paracellular differed significantly among species (D-glucose:  $F_{5,29}=36.41$ ,  $P<0.001$ ; 3OMD-glucose:  $F_{4,25}=77.9$ ,  $P<0.001$ ; Fig. 3). All bat species had significantly higher paracellular proportions than rodents for both D-glucose and 3OMD-glucose ( $P<0.05$  for all comparisons). Values significantly exceeded 100% in bats in some cases (*S. lilium* 3OMD-glucose proportion,  $p=0.004$ , and *A. lituratus* glucose proportion,  $p=0.0046$ ) likely because of molecular size differences between probes used to estimate the paracellular contribution to absorption (see Discussion).

#### *Fractional absorption of probes in intact animals*

Fractional absorption ( $f$ ) of 3OMD-glucose in *A. montensis* was  $0.97\pm0.04$  ( $N=6$ ; not significantly different from unity), and fractional absorption of L-arabinose was significantly lower ( $0.35\pm0.05$ ,  $N=6$ ,  $p=0.0001$ ; Fig 4). For *S. lilium* the fractional absorption of 3OMD-glucose was also complete ( $1.46\pm0.48$ ,  $N=5$ , not significantly different from unity) as was fractional absorption of L-arabinose ( $1.2\pm0.27$ ,  $N=5$ ; Fig 4), which was significantly higher than that of the rodent ( $P<0.001$ ).

## **Discussion**

#### *Fractional absorption of probes in intact animals*

As we predicted, the fractional absorption of the paracellularly-absorbed probe L-arabinose was significantly higher in the bat (*S. lilium*) than in the rodent (*A. montensis*). In both species, 3OMD-glucose was completely absorbed. Fractional absorption of both probes was complete in bats. Values above 1 are likely due to our experimental design, because different animals were used for gavage and injection trials, instead of measuring both treatments in the same individuals. The difference in L-arabinose absorption between the bat and the rodent is in accordance with the pattern of absorption of nutrient-sized paracellular probes in other small bats, birds, and nonflying mammals (Table 1), giving additional support to the hypothesis that high paracellular nutrient absorption is an adaptation for flight (Caviedes-Vidal et al., 2007).

In the bat, we provided animals with oral solutions that lacked  $\text{Na}^+$  so that that they would not reject the dose. Although sodium is required for  $\text{Na}^+$ -coupled D-glucose absorption, it is not required for a whole-animal experiment such as this, because  $\text{Na}^+$  is

secreted into the intestinal lumen with bicarbonate and also diffuses from the blood (Brody, 1999). Animals absorb nearly all the glucose in their diets even if those diets are low in  $\text{Na}^+$  (Brody, 1999), and in fact, we observed complete absorption of 3OMD-glucose by the bats in this study.

High paracellular nutrient absorption may have consequences in animals that primarily consume fruit, especially fruits rich in secondary metabolites that are potentially toxic like those from the families Solanaceae and Piperaceae, which are known to be the main food of *S. lilium* (Mello et al., 2008). The toxin problem may be mitigated by various aspects of bats' behavior and physiology, such as geophagia (Ghanem et al., 2013), having efficient tissue-specific detoxification systems, higher rates of toxin biotransformation and higher kidney glomerular filtration rates (Karasov et al., 2012). Karasov et al. (2012) demonstrated a high reliance on paracellular nutrient absorption in small birds, and proposed the following trade off: the energy that birds gain by absorbing nutrients passively at low energetic cost may be offset, at least partially, by the metabolic demands placed on them to biotransform and eliminate concomitantly absorbed secondary metabolites. Our data suggest that the issue of increased toxic burden due to high paracellular permeability of the intestine may be important for frugivorous bats as well. The need for further research on the mechanisms and implications of the absorption of toxicants, especially water-soluble compounds, is apparent.

#### *Intestinal perfusion experiments*

In agreement with our prediction, the three frugivorous bats showed 2-12 fold higher L-arabinose clearance than the rodents in our intestinal perfusion experiments. This finding demonstrates that previously described differences in L-arabinose absorption between intact bats and rodents (Caviedes-Vidal et al., 2008; Fasulo et al., 2013a; Fasulo et al., 2013b; Karasov et al., 2012; Lavin, 2007 and current study) may be explained by differences in intestinal permeability, and not merely by differences in gut retention time, intestine size, or other factors. Although our data indicate a functional difference between bats and rodents at the level of the intestine, the mechanisms driving this difference are uncertain. Our clearance data were calculated per nominal surface area. High L-arabinose clearance in bats could arise from having more tight junctions per nominal surface area (e.g., via longer villi) and/or from having more permeable tight junctions (e.g., via differential expression of particular proteins that form the tight junctions).

Previous studies have suggested that whole-animal paracellular absorption of glucose correlates positively (Pappenheimer, 1990; Pappenheimer, 1998) or negatively (Caviedes-Vidal et al., 2007) with body size. Within bats, our perfusion results might suggest a positive



relationship (based on very few data points) between L-arabinose clearance and body size, in that the largest bat (*A. lituratus*) had the greatest L-arabinose clearance while the smallest (*C. perspicillata*) had the least. In contrast, the largest rodent (laboratory rat) had the lowest L-arabinose clearance among rodents. Our results are therefore somewhat equivocal as to the effect of body mass on intestinal paracellular permeability to nutrient-sized molecules. We selected bat and rodent species with significant overlap in body mass, such that most of the rodents were bracketed in size by the bats, all of which had much higher L-arabinose clearance than the rodents. Thus, if body mass does have some general effect on L-arabinose clearance, that effect appears small relative to the effect of taxon.

Additionally, it is unknown whether diet is associated with any difference in paracellular permeability of the intestinal epithelium. We tried to minimize any effect of diet by choosing species that all specialize on carbohydrate-based diets. Further diet matching would have been difficult: for example, finding non-flying fruit specialist mammals of the same size range as our bats would have been difficult if not impossible. Thus, it is possible that the high paracellular nutrient absorption we observed in bats relative to rodents is not associated with flight, per se, but rather a combination of flight and diet differences between the taxa we tested. Our more immediate concern, however, was demonstration of a link between high paracellular nutrient absorption at the whole-animal level and paracellular permeability characteristics of the intestine. Regardless of any putative dietary association, our results show that the differences among taxa in paracellular nutrient absorption that we have observed in intact animals can be demonstrated at the level of the intestine as well.

Molecule size has an important effect on paracellular absorption, and previous studies in both intact animals and isolated preparations have demonstrated decreasing paracellular probe absorption with increasing probe size (Anderson and Van Itallie, 2009; Chediack et al., 2003; Delahunty and Hollander, 1987; Elia et al., 1987; Lavin et al., 2007; Price et al., 2013a). This size sieving effect makes it difficult to accurately estimate glucose absorption using L-arabinose. Because of its smaller size ( $M_r$  150 vs. 180), L-arabinose can more freely traverse the tight junction, and therefore, our calculations of glucose absorption via the paracellular route are overestimated. This explains why we calculate percent paracellular absorption higher than 100% in some cases (in bats); the higher mobility of L-arabinose in crossing tight junctions more than offsets the effect of transporter-mediated absorption of glucose. Higher absorption of L-arabinose than D-glucose has been observed previously in both intestinal perfusions and intact animals (Karasov et al., 2012; Price et al., 2013a). The size sieving effect also explains, in part, why D-glucose ( $M_r$  180) absorption was higher than

3OMD-glucose ( $M_r$  194) absorption. Absorption of D-glucose by transporter-mediated means is also likely higher than 3OMD-glucose due to higher affinity for the glucose transporter (Ikeda et al., 1989; Kimmich, 1981).

## Conclusions

This study supports the hypothesis that flying mammals (bats) rely heavily on paracellular nutrient absorption compared to rodents. Furthermore, differences among taxa in their reliance on paracellular absorption are driven by variation in intestinal permeability to nutrient-sized molecules and not merely by differences in gut retention time, intestine size, or other factors. These findings are in agreement with other studies but an enlarged comparative dataset including omnivorous, carnivorous, and nectarivorous bats will ultimately permit a more robust, phylogenetically informed test of the hypothesis that increased intestinal paracellular absorption has evolved as compensation for smaller intestinal size in flying vertebrates.

## Materials and methods

### Animals

Montane grass mice (*Akodon montensis*; body mass:  $37.4 \pm 3.4$  g) are omnivorous cricetid rodents, but their diet consists primarily of plant material (Talamoni et al., 2008). They were captured during the rainy season between October and November of 2012 in the Mata do São José (a remnant intact forest 15 km northeast of Rio Claro, São Paulo, Brazil). Montane grass mice were housed individually at the Universidade Estadual Paulista in Rio Claro in standard rodent cages and kept in a temperature-controlled room ( $22 \pm 1^\circ\text{C}$ ) with a 12:12 light-dark cycle and access to water and standard laboratory chow (Sogorb, Lapa São Paulo, Brazil) *ad libitum*. Laboratory mice (*Mus musculus*, strain ND4; body mass  $34.5 \pm 3.2$  g) and laboratory rats (*Rattus norvegicus*, strain Sprague-Dawley;  $502 \pm 48$  g) are omnivores with primarily carbohydrate-based diets. Both were obtained from Harlan (Indianapolis, IN, USA) and housed at the University of Wisconsin in similar light and temperature conditions with standard rodent chow (Harlan) and water provided *ad libitum*.

The bats – *Artibeus lituratus* ( $61 \pm 1.4$  g), *Sturnira lilium* ( $21.8 \pm 0.7$  g), and *Carollia perspicillata* ( $16 \pm 0.7$  g) – are fruit and fruit juice specialists of the Phyllostomidae family (Mello et al., 2008; Mello et al., 2004; Passos and Gracioli, 2004). We captured bats with mist nets in November and December near a cave at the Fazenda da Toca, Itirapina, São Paulo, Brazil ( $22^\circ 11' 58''\text{S}$ ,  $47^\circ 44' 49''\text{W}$ ), and also at the Mata do São José. They were held in



large outdoor flight cages in Rio Claro. Bats were provided with fruits (bananas, apples, and papayas) and water *ad libitum*.

All experiments were performed during the primary active period of the animals, i.e., nocturnally for all species. Experiments on bats and *Akodon montensis* were performed at the Universidade Estadual Paulista in Rio Claro, while those on laboratory mice and rats were performed at the University of Wisconsin-Madison with overlapping personnel and using identical protocols except as noted. All animal procedures adhered to institutional animal use regulations and approved animal use protocols (*Universidade Estadual Paulista*: protocol A1-2013; *University of Wisconsin*: protocol A01441).

#### *Recirculating intestinal perfusions*

The procedure for intestinal perfusions largely followed the protocol of Price et al. (2013a). Animals were anesthetized using isoflurane throughout the experimental procedure (0.8 L/min oxygen flow, 3.5–4% isoflurane during surgical preparation, 1–2% isoflurane during perfusion). Anesthetized animals were taped to a heating pad (Deltaphase Isothermal Pad, Braintree Scientific Inc., Braintree, MA, USA) that maintained a constant 37°C. A peritoneal incision was made and the intestine was cannulated ~1 cm from the stomach using a rat gavage needle as the cannula, which was secured with suture. An exit cannula was placed as far as possible from the entrance cannula distally, attempting to perfuse as much intestine as possible. The incision site was periodically moistened with physiological saline. Prewarmed saline solution was first flushed through the cannulated segment for 5 min to remove residual digesta. Then, a prewarmed buffer containing the experimental probes (10 mM D-glucose, tracer amounts of [methyl-<sup>3</sup>H]-3-O-methyl-D-glucose (3OMD-glucose), 10 mM L-arabinose, tracer amounts of [1-<sup>14</sup>C]-L-arabinose, 10 mM L-proline, 10 mM lactulose, 100 mM NaCl, 1.2 mM NaHPO<sub>4</sub>, 20 mM NaHCO<sub>3</sub>, 5mM KCl, 1mM MgSO<sub>4</sub>, and 2 mM CaCl<sub>2</sub>, pH 7.4) was passed through the intestinal loop and recirculated using a peristaltic pump for ~ 2 h (flow rate=1 ml/min). The perfusion reservoir was kept in a water bath at 37°C and sealed to avoid evaporative water loss. Once the perfusion ended, the perfusate was collected, the perfused section of intestine was removed from the abdomen and the animal was euthanized. The perfused segment of the intestine was measured for length using a caliper and then cut longitudinally and laid flat to measure circumference. The average of 3 measurements taken along the length of the perfused section was used for further calculations. We calculated the “nominal surface area perfused” (smooth bore tube) as the product of the length × circumference, and calculated absorption of probes as the decrease in probe amount in the reservoir during the experiment (nmol) divided by the experiment

duration (contact time on the intestine; min) and nominal surface area perfused ( $\text{cm}^2$ ). To calculate clearance, we divided absorption rate by  $[(C_{\text{initial}} - C_{\text{final}})/(C_{\text{initial}}/C_{\text{final}})]$ , where C is probe concentration (Sadowski and Meddings, 1993), to correct for changes in concentration over the course of the experiment. Using L-arabinose absorption as a proxy for the portion of glucose absorption that is paracellular, we calculated a “percent paracellular absorption” as  $100 \times (\text{arabinose absorption}) / (\text{glucose absorption})$ . This likely overestimates that proportion of glucose that is paracellular, a point we consider in our discussion.

The initial perfusion volume was ~12 ml and aliquots were taken at the beginning and end of the perfusion to measure the concentration of probes. The perfusate was weighed pre- and post-perfusion with an analytical scale to determine the change in volume. Radionuclide activity in the samples was measured by scintillation counting (*Brazil*: Plate Chameleon<sup>TM</sup>V Scintillation Microplate Reader, and Plate Chameleon V Liquid, Hidex, Turku, Finland; *USA*: Wallac 1414 LSC, PerkinElmer, Waltham MA and Ecolume scintillation cocktail, MP Biomedicals, Solon OH). When using the Plate Chameleon reader, counts were corrected for  $^{14}\text{C}$  spill and variable quenching by adding internal standards to replicate samples.

Glucose concentration was measured with commercial kits (Laborlab, Guarulhos São Paulo, Brazil and Sigma, St. Louis, MO, USA); assays were conducted according to manufacturers’ instructions.

#### *Fractional absorption of probes measured in vivo*

Fractional absorption by intact animals was determined using standard pharmacokinetic procedures. Probes were administered to animals either by intraperitoneal injection or orally (in both cases, *S. lilium* n = 5; *A. montensis* n = 6). Oral doses were given in a solution (*S. lilium*  $59.6 \pm 3.6 \mu\text{l}$ ; *A. montensis*  $82.1 \pm 22.5 \mu\text{l}$ ) that contained 125 mM NaCl (*A. montensis* only), 50 mM D-glucose, and tracer amounts of [ $^3\text{H}$ ]3OMD-glucose (~0.15  $\mu\text{Ci/g}$  body mass and [ $^{14}\text{C}$ ] L-arabinose (~0.015  $\mu\text{Ci/g}$  body mass). The dose was administered by oral gavage to the stomach in the grass mice. In the bat, access to the stomach is made difficult by the narrow pharyngeal anatomy of this species. For that reason, we delivered the dose to the mouth in bats, and did not use salt in the gavage solution so that the bats would not reject the dose due to taste. This lack of sodium should not have affected our results, because  $\text{Na}^+$  is secreted into the gut with bicarbonate and can diffuse from the blood (Brody, 1999). Injected (i.p.) doses with the same tracers were delivered in physiological saline (*S. lilium*  $26.5 \pm 2.7 \mu\text{l}$ ; *A. montensis*  $24.1 \pm 3.0 \mu\text{l}$ ).

For bats, a series of small blood samples ( $\leq 20 \mu\text{l}$ ) was taken from the superficial veins of the wings and legs at approximately 8, 18, 30, 50, 80 and 120 min post-

administration. Plasma was separated using standard heparinized hemo-capillary tubes (Fisher Scientific, Pittsburg, PA, USA) and a microhematocrit centrifuge (SIGMA 1-14 Microfuge with microhematocrit rotor 11026). Plasma mass was weighed with an analytical scale and tracer concentration was measured by scintillation counting.

Montane grass mice, after administration of radiolabeled probes, were transferred to metabolic cages with wire bottoms and a funnel underneath to collect urine samples. While in the metabolic chambers, the grass mice were provided sucrose solution (10% w/v) *ad libitum* in order to supply calories and cause them to urinate more (Pappenheimer, 1990). Urine was collected every 1-2 hours, and a 10  $\mu$ l subsample was taken for scintillation counting.

#### *Pharmacokinetic calculations*

The procedure for pharmacokinetic calculations followed the protocol of Karasov et al. (2012). In plasma sampling, fractional absorption ( $f$ ) was calculated as  $(AUC_{totaloral})/(AUC_{totalinj})$ , where AUC = dose-corrected area under the curve of plasma probe concentration vs. time. For each compound, the concentration ( $C_t$ ; dpm  $g^{-1}$  plasma) in each plasma sample at time  $t$  was normalized to the weight of each sample and to the administered dose (dpm), and plotted against time since administration (either orally or by injection). The integration of the area under this curve ( $AUC_t$ ) represents the amount of compound that has been absorbed from time 0 up to time  $t$ , whereas  $AUC_{total}$  denotes the total amount of compound absorbed from time 0 out to infinity ( $\infty$ ). Following typical procedures in pharmacokinetics, the area from  $t = 0$  to  $t = x$ , (the time of the final blood sample) was calculated using the trapezoidal rule. The area from the final sample time to  $t = \infty$  was calculated as  $AUC^{x \rightarrow \infty} = C_t$  (at  $t = x$ )/ $k$ , where  $k$  is a rate constant that was determined based on the terminal portion of the absorption curve of all bats sampled. The total  $AUC^{x \rightarrow \infty}$  was obtained by summing the two areas.

This method of calculating  $f$  makes no major assumptions about compartments or kinetics and is an estimate of how much of the ingested probe was absorbed into the animal's system. We could not calculate apparent fractional absorption for each individual bat because individuals were not administered probes both by injection and orally. However, the mean and variance of  $f$  for the population of bats was estimated based on the population of data from each route of administration as described in Stuart and Ord (1994).

For each probe in the urine collection trials, the amount of the probe collected at each sampling time  $t$  was normalized to dose and multiplied by 100. Fractional absorption of each probe was determined by dividing the (cumulative % recovery of each probe following oral gavage) by the (cumulative % recovery following i.p. injection).

### *Statistical analyses*

Statistical analyses were conducted with SYSTAT and results are expressed as means  $\pm 1$  standard error (s.e.m.). In intestinal perfusions, differences among species in absorption, clearance, and paracellular proportion were determined using ANOVA with Tukey's post-hoc tests. We analyzed the correlation between D-glucose and 3OMD-glucose absorption using least-squares regression analysis. Percentages were divided by 10 and then arcsine square root transformed prior to statistical comparisons. Fractional absorption ( $f$ ) values for probes were arcsine-square root transformed prior to statistical comparisons. Differences between species in fractional absorption in intact animals were determined using 2-sample T-tests. Fractional absorption values differing from the theoretical value of 1 were detected using 1-sample T-tests. Significance was determined at  $\alpha < 0.05$ .

### **Acknowledgements**

We thank Guilherme Ambar for assistance in the field. Ted Taylor, Paul François, and Kimberly Kelly kindly assisted us with laboratory and logistic details. We thank Alexandre Castellar for catching the rodents.

### **Funding**

Funding was provided by FAPESP (2012/04610-5 to APC-N), the National Science Foundation (IOS-1025886 to WHK and ECV), Agencia Nacional de Promoción Científica y Tecnológica (FONCYT PICT2007 01320 to ECV), The Company of Biologists (JEB Travelling Fellowship to ERP), Universidad Nacional de San Luis (CyT 9502), and the Department of Forest and Wildlife Ecology at the University of Wisconsin-Madison. Funding agencies had no role in study design, analysis or interpretation of the data, or writing and submitting the article.

## References

- Anderson, J. and Van Itallie, C.** (2009). Physiology and function of the tight junction. *Cold Spring Harbor Perspect Biol* **1**, a002584.
- Brody, T.** (1999). Nutritional biochemistry. San Diego: Academic Press.
- Caviedes-Vidal, E., Karasov, W. H., Chediack, J. G., Fasulo, V., Cruz-Neto, A. P. and Otani, L.** (2008). Paracellular absorption: a bat breaks the mammal paradigm. *PLoS ONE* **3**, e1425.
- Caviedes-Vidal, E., McWhorter, T. J., Lavin, S. R., Chediack, J. G., Tracy, C. R. and Karasov, W. H.** (2007). The digestive adaptation of flying vertebrates: high intestinal paracellular absorption compensates for smaller guts. *Proc Natl Acad Sci U S A* **104**, 19132-7.
- Chediack, J. G., Caviedes-Vidal, E., Fasulo, V., Yamin, L. J. and Karasov, W. H.** (2003). Intestinal passive absorption of water-soluble compounds by sparrows: Effect of molecular size and luminal nutrients. *Journal of Comparative Physiology B Biochemical Systemic and Environmental Physiology* **173**, 187-197.
- Delahunty, T. and Hollander, D.** (1987). A comparison of intestinal permeability between humans and three common laboratory animals. *Comparative Biochemistry and Physiology Part A: Physiology* **86**, 565-567.
- Elia, M., Behrens, R., Northrop, C., Wraight, P. and Neale, G.** (1987). Evaluation of mannitol, lactulose and <sup>51</sup>Cr-labelled ethylenediaminetetra-acetate as markers of intestinal permeability in man. *Clin Sci (Lond)* **73**, 197-204.
- Fasulo, V., Zhang, Z., Chediack, J. G., Cid, F. D., Karasov, W. H. and Caviedes-Vidal, E.** (2013a). The capacity for paracellular absorption in the insectivorous bat *Tadarida brasiliensis*. *J Comp Physiol B* **183**, 289-296.
- Fasulo, V., Zhang, Z., Price, E. R., Chediack, J. G., Karasov, W. H. and Caviedes-Vidal, E.** (2013b). Paracellular absorption in laboratory mice: Molecule size-dependent but low capacity. *Comparative Biochemistry and Physiology Part A: Molecular & Integrative Physiology* **164**, 71-76.
- Ghanem, S. J., Ruppert, H., Kunz, T. H. and Voigt, C. C.** (2013). Frugivorous bats drink nutrient- and clay-enriched water in the Amazon rain forest: support for a dual function of mineral-lick visits. *Journal of Tropical Ecology* **29**, 1-10.
- He, Y. L., Murby, S., Warhurst, G., Gifford, L., Walker, D., Ayrton, J., Eastmond, R. and Rowland, M.** (1998). Species differences in size discrimination in the paracellular pathway reflected by oral bioavailability of poly(ethylene glycol) and D-peptides. *J Pharm Sci* **87**, 626-33.
- Ikeda, T. S., Hwang, E. S., Coady, M. J., Hirayama, B. A., Hediger, M. A. and Wright, E. M.** (1989). Characterization of a Na<sup>+</sup>/glucose cotransporter cloned from rabbit small intestine. *J Membr Biol* **110**, 87-95.

- Karasov, W. H., Caviedes-Vidal, E., Bakken, B. H., Izhaki, I., Samuni-Blank, M. and Arad, Z.** (2012). Capacity for absorption of water-soluble secondary metabolites greater in birds than in rodents. *PLoS ONE* **7**, e32417.
- Kimmich, G. A.** (1981). Intestinal absorption of sugar. In *Physiology of the Gastrointestinal Tract*, (ed. L. R. Johnson), pp. 1035-1061. New York: Raven Press.
- Lavin, S. R.** (2007). Small intestine morphometrics and paracellular absorption in birds mammals. In *Dept of Wildlife Ecology*, vol. PhD Dissertation. Madison: University of Wisconsin - Madison.
- Lavin, S. R. and Karasov, W. H.** (2008). Allometry of Paracellular Absorption in Birds. *Physiological and Biochemical Zoology* **81**, 551-560.
- Lavin, S. R., McWhorter, T. J. and Karasov, W. H.** (2007). Mechanistic bases for differences in passive absorption. *Journal of Experimental Biology* **210**, 2754-2764.
- McWhorter, T. J.** (2005). Paracellular intestinal absorption of carbohydrates in mammals and birds. In *Physiological and ecological adaptations to feeding in vertebrates*, eds. J. M. Starck and T. W. Wang), pp. 113-140. Enfield: Science Pub Inc.
- Mello, M. A. R., Kalko, E. K. V. and Silva, W. R.** (2008). Diet and Abundance of the Bat *Sturnira lilium* (Chiroptera) in a Brazilian Montane Atlantic Forest. *Journal of Mammalogy* **89**, 485-492.
- Mello, M. A. R., Schittini, G. M., Selig, P. and Bergallo, H. G.** (2004). Seasonal variation in the diet of the bat *Carollia perspicillata* (Chiroptera: Phyllostomidae) in an Atlantic Forest area in southeastern Brazil. *Mammalia* **68**, 49-55.
- Pappenheimer, J. R.** (1990). Paracellular intestinal absorption of glucose, creatinine, and mannitol in normal animals: relation to body size. *American Journal of Physiology* **259**, G290-G299.
- Pappenheimer, J. R.** (1998). Scaling of dimensions of small intestines in non-ruminant eutherian mammals and its significance for absorptive mechanisms. *Comp Biochem. Physiol A Mol. Integr. Physiol* **121**, 45-58.
- Pappenheimer, J. R. and Reiss, K. Z.** (1987). Contribution of solvent drag through intercellular junctions to absorption of nutrients by the small intestine of the rat. *Journal of Membrane Biology* **100**, 123-136.
- Passos, F. and Graciolli, G.** (2004). Observacoes da dieta de *Artibeus lituratus* (Olfers) (Chiroptera, Phyllostomidae) em duas areas do sul do Brasil. *Revista Brasileira de Zoologia* **21**, 487-489.
- Price, E. R., Brun, A., Fasulo, V., Karasov, W. H. and Caviedes-Vidal, E.** (2013a). Intestinal perfusion indicates high reliance on paracellular nutrient absorption in an insectivorous bat *Tadarida brasiliensis*. *Comparative Biochemistry and Physiology - Part A: Molecular & Integrative Physiology* **164**, 351-355.
- Price, E. R., Ruff, L. J., Guerra, A. and Karasov, W. H.** (2013b). Cold exposure increases intestinal paracellular permeability to nutrients in the mouse. *J Exp Biol* **216**, 4065-70.



- Sadowski, D. C. and Meddings, J. B.** (1993). Luminal nutrients alter tight-junction permeability in the rat jejunum. *Can. J. Physiol. Pharmacol.* **71**, 835-839.
- Shilton, L. A., Altringham, J. D., Compton, S. G. and Whittaker, R. J.** (1999). Old World fruit bats can be long-distance seed dispersers through extended retention of viable seeds in the gut. *Proceedings of the Royal Society of London. Series B: Biological Sciences* **266**, 219-223.
- Stuart, A. and Ord, K.** (1994). Kendall's Advanced Theory of Statistics. Distribution Theory. London: Arnold.
- Talamoni, S. A., Couto, D., Cordeiro Júnior, D. A. and Diniz, F. M.** (2008). Diet of some species of Neotropical small mammals. *Mammalian Biology - Zeitschrift für Säugetierkunde* **73**, 337-341.
- Tracy, C. R., McWhorter, T. J., Korine, C., Wojciechowski, M. S., Pinshow, B. and Karasov, W. H.** (2007). Absorption of sugars in the Egyptian fruit bat (*Rousettus aegyptiacus*): a paradox explained. *J Exp Biol* **210**, 1726-34.

L- arabinose

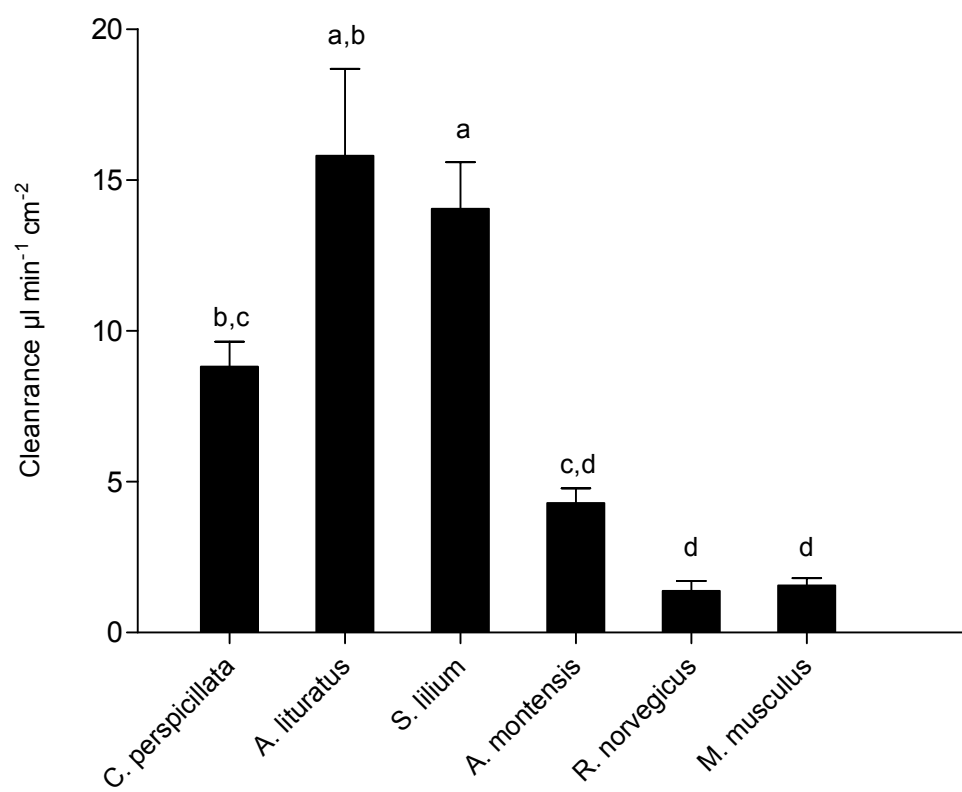

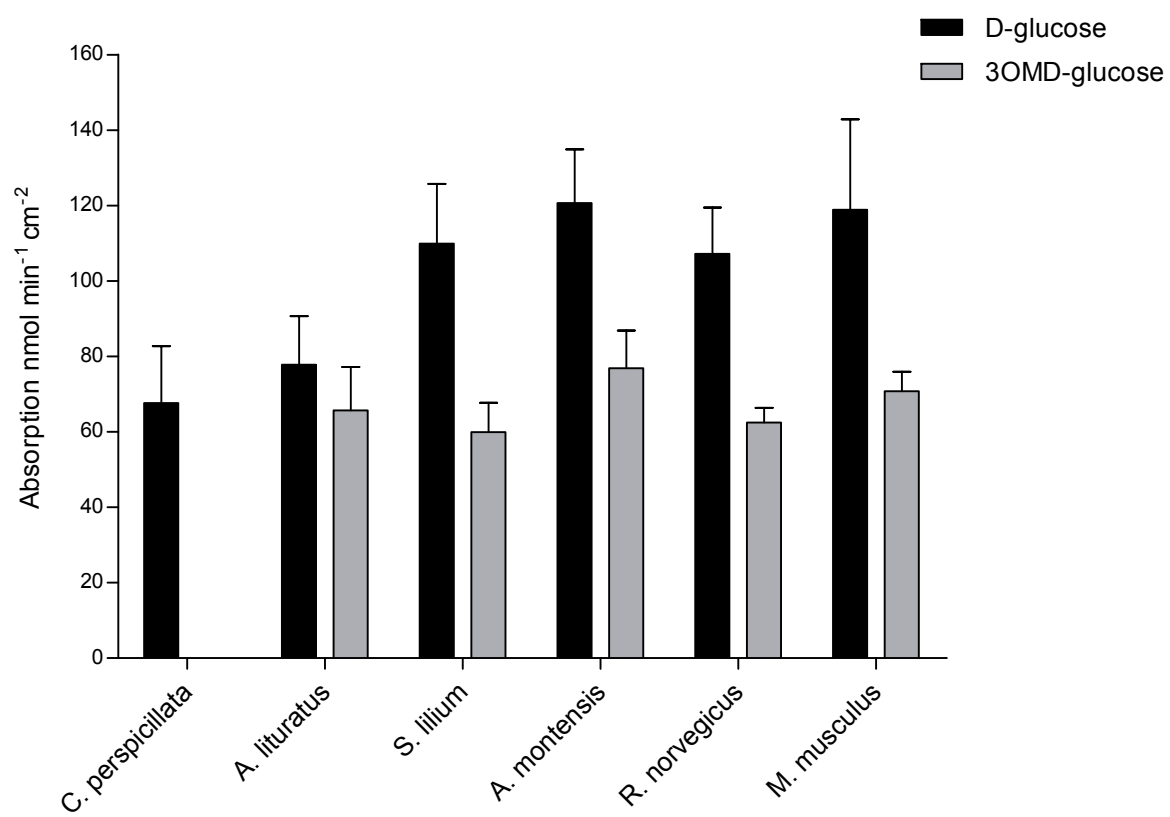

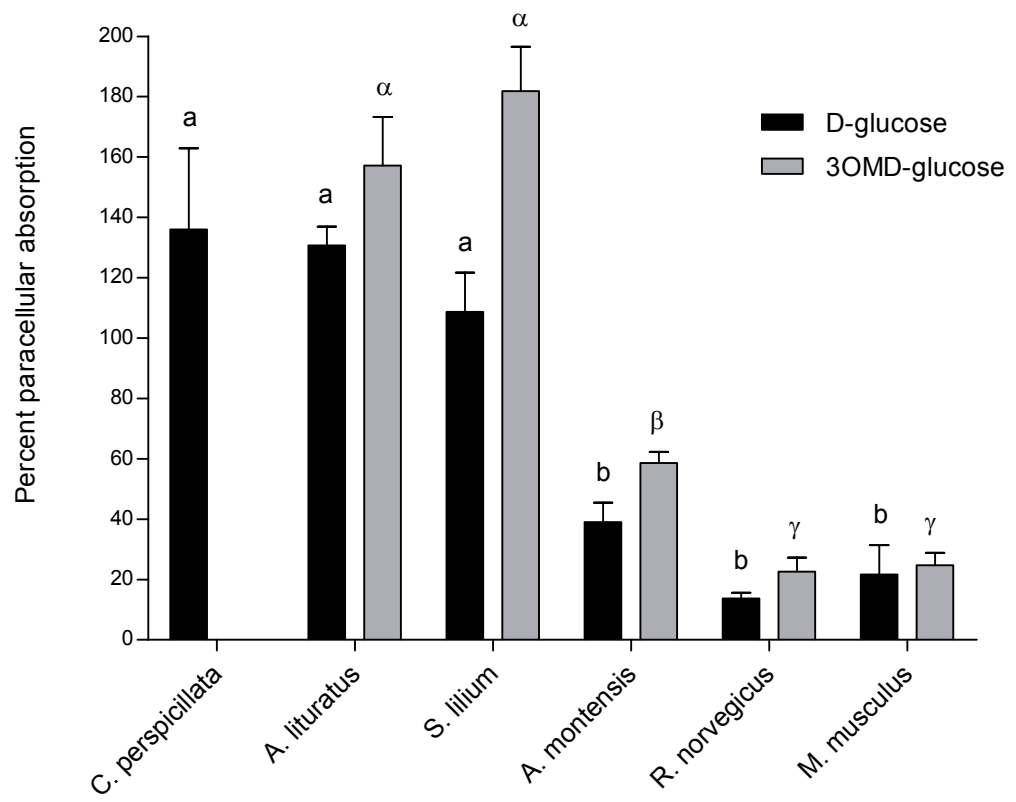

# *Akodon montensis*

L-arabinose

A

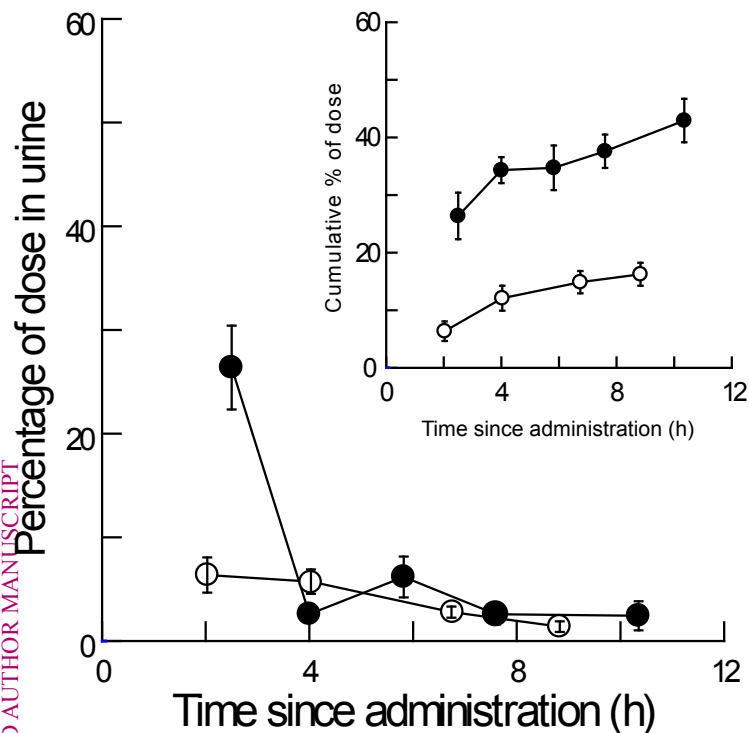

3OMD-glucose

B

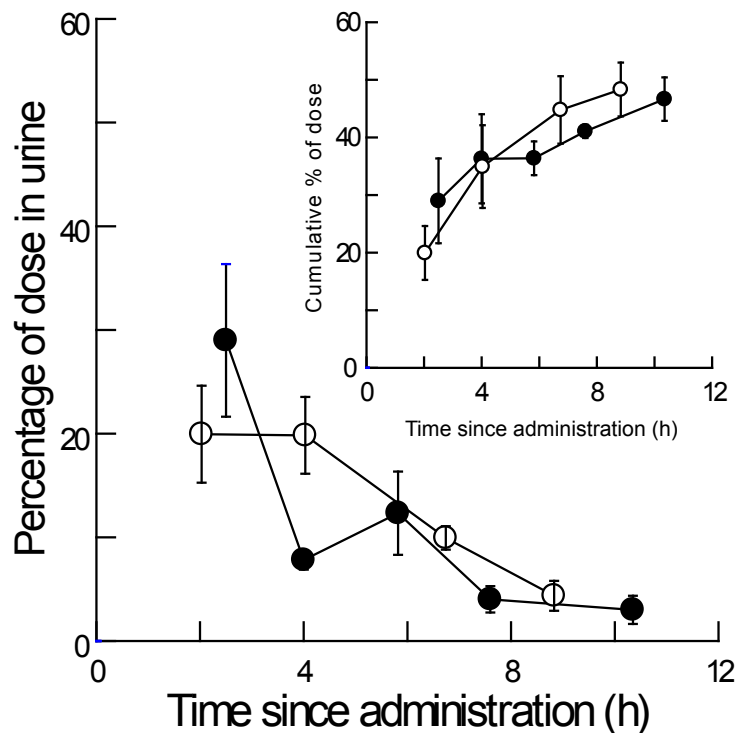

# *Sturnira lilium*

L-arabinose

C

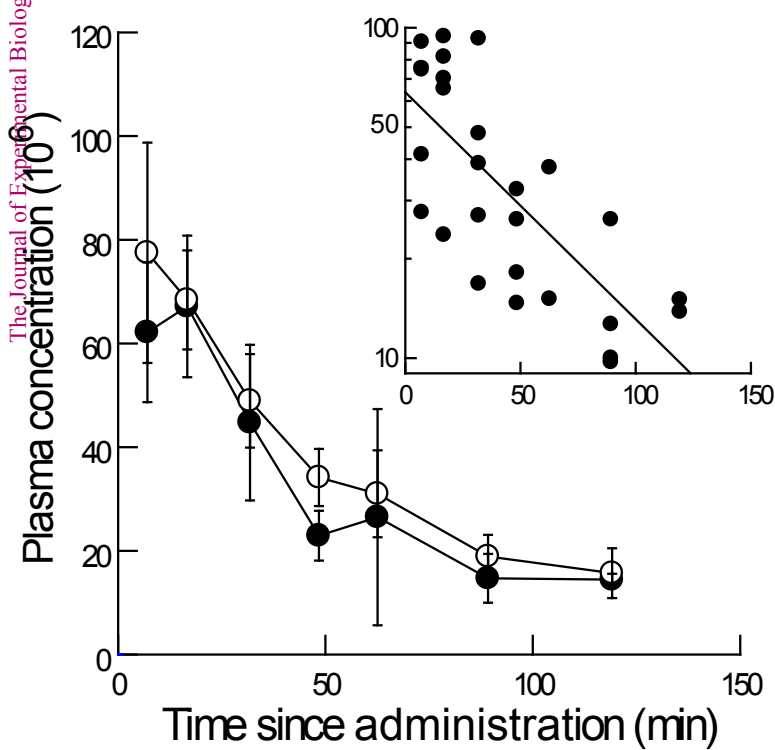

3OMD-glucose

D

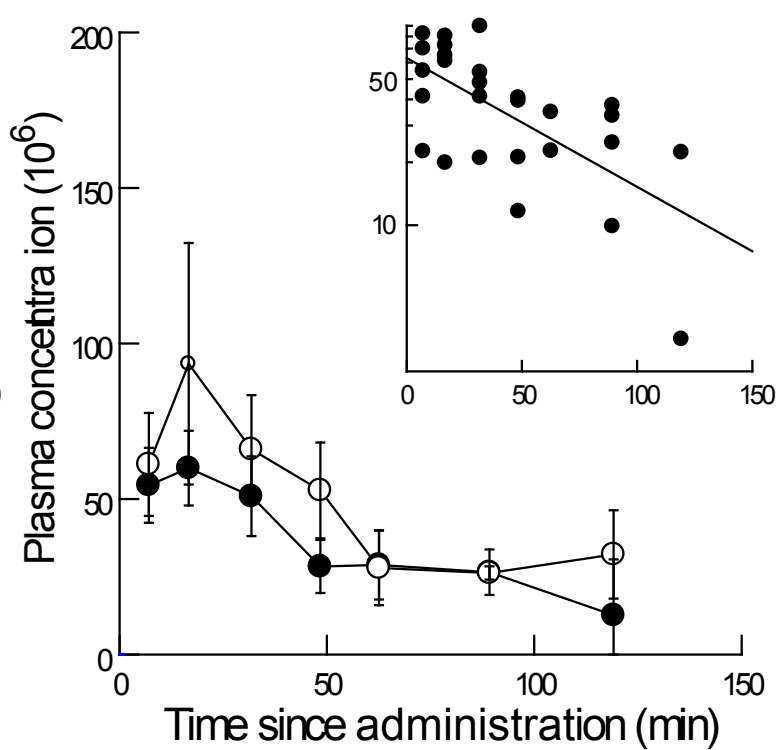

Administration: ● Injection ○ Oral

## Figure legends

### Figure 1. Clearance of L-arabinose in a 2-h intestinal luminal perfusion of *C.*

*perspicillata* n=5; *A. lituratus* n=6; *S. lilium* n=6; *A. montensis* n=6; *R. norvegicus* n=7; and *M. musculus* n=6. Data are means  $\pm$  SE; bars that share letters indicate no statistically significant difference ( $P>0.05$ ).

### Figure 2. Absorption of D-glucose and 3OMD-glucose in a 2-h intestinal luminal

perfusion in bats and rodents. Data are means  $\pm$  SE; there were no statistically significant differences among species for either probe ( $P>0.05$ ). Sample sizes for D-glucose and 3OMD-glucose, respectively, were: *C. perspicillata*: n=5 and none, *A. lituratus*: n=6 and 6, *S. lilium*: n=6 and 5, *A. montensis*: n=6 and 6, *R. norvegicus* n=7 and 7, *M. musculus* n=6 and 6.

### Figure 3. Apparent percent absorption by the paracellular pathways of D-glucose and

3OMD-glucose based on the absorption of L-arabinose. Data are means  $\pm$  SE; similar letters within a series (Latin letters for D-glucose and Greek letters for 3OMD-glucose) indicate no statistically significant difference ( $P\geq 0.05$ ). Values for paracellular absorption exceed 100%, likely because of size differences among D-glucose ( $M_r$  180), 3OMD-glucose ( $M_r$  194), and L-arabinose ( $M_r$  150; see Discussion). Sample sizes for D-glucose and 3OMD-glucose, respectively, were as follows: *C. perspicillata*: n=5 and none, *A. lituratus*: n=6 and 6, *S. lilium*: n=6 and 5, *A. montensis*: n=6 and 6, *R. norvegicus* n=7 and 7, *M. musculus* n=6 and 6.

### Figure 4. Urine recovery of probe molecules as a function of time in a rodent (panels A and B) and plasma concentration of probe molecules as a function of time in a bat

(panels C and D). For *A. montensis* (n=8; panels A, B), urine recovery plots show the percentage of the dose eliminated as a function of time and insets show the cumulative percentage of dose eliminated over the ~10-hour trial. Unfilled circles denote the probe in urine following oral administration; filled circles represent the probe in urine after administration by injection.

For *S. lilium* (n=9; panels C, D), plasma concentration plots show the concentration normalized to dose (multiplied by  $10^6$  for ease of display) as a function of time and the inset is a semi-log plot of plasma values post-injection, fit to a line by linear regression. Unfilled circles denote probe in plasma following oral administration; filled circles represent probe in plasma following injection. Data are means  $\pm$  SE.



## Tables

Table 1. Fractional absorption of orally dosed carbohydrates in intact small mammals (<100 g).

| Common name                  | Scientific name              | Body mass (g) | Fractional absorption measured for various carbohydrate probes |                                 |                                           | References                                  |
|------------------------------|------------------------------|---------------|----------------------------------------------------------------|---------------------------------|-------------------------------------------|---------------------------------------------|
|                              |                              |               | L-arabinose (M <sub>r</sub> 150)                               | L-rhamnose (M <sub>r</sub> 164) | 3-O-methyl-D-glucose (M <sub>r</sub> 194) |                                             |
| Brazilian Free-tailed Bat    | <i>Tadarida brasiliensis</i> | 11            | 1.09                                                           | -                               | 1.03                                      | Fasulo et al. (2013a)                       |
| Little Yellow-shouldered Bat | <i>Sturnira lilium</i>       | 22            | 1.2                                                            | -                               | 1.46                                      | This study                                  |
| Great Fruit-eating Bat       | <i>Artibeus lituratus</i>    | 70            | -                                                              | 0.9                             | 0.96                                      | Caviedes-Vidal et al. (2008)                |
| Laboratory Mouse             | <i>Mus musculus</i>          | 28            | 0.14 – 0.21                                                    | -                               | 0.95                                      | Fasulo et al. (2013b); Price et al. (2013b) |
| Montane Grass Mouse          | <i>Akodon montensis</i>      | 37            | 0.35                                                           | -                               | 0.97                                      | This study                                  |
| Common Spiny Mouse           | <i>Acomys achirinus</i>      | 55            | 0.42                                                           | -                               | 0.95                                      | Karasov et al. (2012)                       |
| Golden Spiny Mouse           | <i>Acomys russatus</i>       | 58            | 0.37                                                           | -                               | 0.95                                      | Karasov et al. (2012)                       |
